# Supplementary material
Source: PubMed Central journal article supplement (PMC4712685)
Supplement: NIHMS750225-supplement-Appendix.pdf [file NIHMS750225-supplement-Appendix.pdf]

## Supplementary Online Content

Jain NB, Ayers GD, Peterson EN, et al. Traumatic spinal cord injury in the United States, 1993-2012. *JAMA*. doi:10.1001/jama.2015.6250

**eAppendix 1.** ICD-9 CM Codes for Acute Traumatic Spinal Cord Injury (SCI) Diagnosis

**eAppendix 2.** ICD-9-CM Diagnosis and Procedure Codes for Complications, Etiology, and Procedures

**eTable 1.** Estimated Numbers of Cases With Acute Traumatic Spinal Cord Injury in the United States, 1993-2012

**eTable 2.** Age and Sex Stratified Number of Patients in Nationwide Inpatient Samples With Acute Traumatic Spinal Cord Injury in the United States

**eTable 3.** Age and Sex Stratified Estimated Number of Patients With Acute Traumatic Spinal Cord Injury in the United States

**eTable 4.** Total Population Estimates Used for Calculation of Incidence Rates

**eTable 5.** Population Estimates by Age and Sex Used for Calculation of Incidence Rates

**eTable 6.** Etiology of Acute Traumatic Spinal Cord Injury, United States

**eTable 7.** Select Age-Stratified Trends in Etiology of Acute Traumatic Spinal Cord Injury in the United States

**eReferences**

This supplementary material has been provided by the authors to give readers additional information about their work.

## **eAppendix 1. ICD-9 CM Codes for Acute Traumatic Spinal Cord Injury (SCI) Diagnosis**

### **SCI with Vertebral Fracture**

- Cervical closed: 806.00 – 806.09
- Cervical open: 806.10 – 806.19
- Thoracic closed: 806.20 – 806.29
- Thoracic open: 806.30 – 806.39
- Lumbar (open and closed): 806.4; 806.5
- Sacrum and coccyx closed: 806.60 – 806.69
- Sacrum and coccyx open: 806.70 – 806.79
- Unspecified SCI: 806.8 – 806.9

### **SCI without Vertebral Fracture**

- Cervical: 952.00 – 952.09
- Thoracic: 952.10 – 952.19
- Other and unspecified: 952.2 – 952.9

*Note: Injury to nerve roots and spinal plexus codes not included*

### **Injury Diagnoses**

- Injury and Poisoning: 800.0 – 904.9
- Superficial Injury and Contusions: 910.0 – 929.9
- Burns and injury to nerves and spinal cord : 940.0 – 957.9
- Other and unspecified injury: 959.0 – 959.9

*Note: - Late complications of injury and trauma complication codes excluded  
- Poisoning and toxic effects of substances, external causes (radiation, air pressure, heat, electric current, allergy, child abuse, adult abuse) codes excluded  
- Complications of surgical and medical care codes excluded*

## **eAppendix 2. ICD-9-CM Diagnosis and Procedure Codes for Complications, Etiology, and Procedures**

### **Complications**

- Pulmonary embolism and infarction (excluding septic): 415.11, 415.19
- Deep venous thrombosis of proximal or distal lower extremity: 453.40, 453.41 453.42
- Pressure ulcer: 707.00 through 707.09

### **Etiology**

- Motor vehicle accidents:
  - Motor vehicle traffic accidents: E810.0 through E819.9
  - Motor vehicle non-traffic accidents: E820.0 through E825.9
- Unintentional Falls\* (excludes if undetermined whether accidental or purposely inflicted):
  - E880.0 through E886.9
  - E888.0 through E888.9
- Firearm injuries:
  - E922.0 through E922.3, E922.8, E922.9 (excludes air gun, paintball gun)
  - E955.0 through E955.4 (excludes explosives, air gun, paintball gun, unspecified)
  - E965.0 through E965.4
  - E970
  - E979.4
  - E985.0 through E985.4 (excludes explosives, air gun, paintball gun)

*\*E917.5 to E917.9 codes are used to designate striking against or struck accidentally by objects or persons. Prior to 2001, there was only one code to designate the injury irrespective of whether or not it resulted in a fall. After 2001, the codes were expanded to have separate codes for injury that resulted in a fall versus not. For instance, E917.0 denoted "In sports" prior to 2001. Subsequently, it was revised as denoting "In sports without subsequent fall" and an E917.5 code was added to denote "Object in sports with subsequent fall."*

### **Surgical Procedures**

- Intervertebral disc excision: 80.51
- Spinal canal decompression: 03.09
- Spinal fusion device insertion: 84.51
- Vena cava filter placement: 38.7

**eTable 1.** Estimated Numbers of Cases With Acute Traumatic Spinal Cord Injury in the United States, 1993-2012

| <b>Year</b> | <b>SCI as Primary Diagnosis* Estimated Patients (Standard Deviation)</b> | <b>SCI as Any Diagnoses Estimated Number (Standard Deviation)</b> |
|-------------|--------------------------------------------------------------------------|-------------------------------------------------------------------|
| 1993        | 13,706 (1,270)                                                           | 16,966 (1,420)                                                    |
| 1994        | 13,950 (1,336)                                                           | 17,245 (1,420)                                                    |
| 1995        | 14,439 (1,108)                                                           | 17,969 (1,287)                                                    |
| 1996        | 14,024 (1,175)                                                           | 17,793 (1,371)                                                    |
| 1997        | 12,874 (1,035)                                                           | 17,390 (1,342)                                                    |
| 1998        | 14,494 (1,228)                                                           | 17,978 (1,352)                                                    |
| 1999        | 14,087 (1,025)                                                           | 18,454 (1,288)                                                    |
| 2000        | 13,481 (935)                                                             | 16,880 (1,019)                                                    |
| 2001        | 12,846 (914)                                                             | 15,922 (1,002)                                                    |
| 2002        | 14,096 (1,081)                                                           | 17,789 (1,160)                                                    |
| 2003        | 14,814 (1,139)                                                           | 18,806 (1,348)                                                    |
| 2004        | 18,715 (1,725)                                                           | 22,007 (1,794)                                                    |
| 2005        | 14,132 (1,045)                                                           | 17,649 (1,081)                                                    |
| 2006        | 16,296 (1,120)                                                           | 20,332 (1,214)                                                    |
| 2007        | 16,185 (1,252)                                                           | 20,080 (1,357)                                                    |
| 2008        | 15,342 (1,171)                                                           | 19,250 (1,254)                                                    |
| 2009        | 15,408 (1,048)                                                           | 19,985 (1,266)                                                    |
| 2010        | 19,853 (1,477)                                                           | 24,656 (1,698)                                                    |
| 2011        | 15,628 (1,285)                                                           | 20,276 (1,440)                                                    |
| 2012        | 16,965 (735)                                                             | 21,695 (800)                                                      |

Abbreviations: SCI, Spinal Cord Injury

\*Primary diagnosis indicates primary SCI diagnosis or secondary SCI diagnosis with a primary trauma diagnosis.

**eTable 2.** Age and Sex Stratified Number of Patients in Nationwide Inpatient Samples With Acute Traumatic Spinal Cord Injury in the United States

| Year | Age Groups    |       |       |       |       |     |
|------|---------------|-------|-------|-------|-------|-----|
|      | 16-24         | 25-44 | 45-64 | 65-74 | 75-84 | ≥85 |
|      | <b>Male</b>   |       |       |       |       |     |
| 1993 | 457           | 751   | 351   | 134   | 87    | 38  |
| 1994 | 474           | 771   | 399   | 128   | 103   | 36  |
| 1995 | 464           | 818   | 369   | 135   | 111   | 42  |
| 1996 | 447           | 782   | 413   | 163   | 98    | 31  |
| 1997 | 427           | 786   | 410   | 141   | 111   | 38  |
| 1998 | 431           | 847   | 419   | 120   | 142   | 44  |
| 1999 | 435           | 774   | 486   | 141   | 129   | 58  |
| 2000 | 436           | 770   | 490   | 151   | 125   | 47  |
| 2001 | 381           | 647   | 453   | 147   | 154   | 50  |
| 2002 | 420           | 775   | 555   | 158   | 150   | 61  |
| 2003 | 426           | 729   | 637   | 167   | 147   | 62  |
| 2004 | 573           | 897   | 816   | 195   | 167   | 66  |
| 2005 | 420           | 659   | 591   | 158   | 138   | 61  |
| 2006 | 444           | 811   | 706   | 202   | 176   | 82  |
| 2007 | 455           | 718   | 715   | 193   | 169   | 82  |
| 2008 | 385           | 645   | 700   | 222   | 184   | 85  |
| 2009 | 372           | 586   | 727   | 232   | 177   | 80  |
| 2010 | 439           | 836   | 907   | 276   | 218   | 100 |
| 2011 | 348           | 586   | 756   | 269   | 212   | 97  |
| 2012 | 354           | 586   | 851   | 293   | 171   | 92  |
|      | <b>Female</b> |       |       |       |       |     |
| 1993 | 122           | 197   | 129   | 67    | 87    | 48  |
| 1994 | 109           | 205   | 111   | 65    | 71    | 44  |
| 1995 | 110           | 258   | 138   | 104   | 117   | 41  |
| 1996 | 102           | 231   | 151   | 72    | 95    | 60  |
| 1997 | 113           | 226   | 132   | 101   | 99    | 51  |
| 1998 | 120           | 198   | 156   | 78    | 96    | 58  |
| 1999 | 133           | 202   | 163   | 68    | 95    | 54  |
| 2000 | 112           | 208   | 125   | 71    | 104   | 73  |
| 2001 | 94            | 155   | 144   | 75    | 124   | 46  |
| 2002 | 112           | 215   | 189   | 78    | 129   | 63  |
| 2003 | 130           | 226   | 205   | 106   | 127   | 71  |
| 2004 | 178           | 291   | 267   | 113   | 159   | 75  |
| 2005 | 117           | 193   | 185   | 88    | 138   | 78  |
| 2006 | 139           | 198   | 250   | 93    | 136   | 90  |
| 2007 | 125           | 193   | 227   | 100   | 155   | 85  |
| 2008 | 101           | 208   | 254   | 123   | 161   | 97  |
| 2009 | 98            | 178   | 254   | 139   | 155   | 98  |
| 2010 | 135           | 236   | 305   | 148   | 177   | 118 |
| 2011 | 87            | 170   | 271   | 141   | 165   | 126 |
| 2012 | 105           | 170   | 294   | 135   | 154   | 105 |

**eTable 3.** Age and Sex Stratified Estimated Number of Patients with Acute Traumatic Spinal Cord Injury in the United States

| Year | Age Groups                                                     |                         |                         |                         |                       |                   |
|------|----------------------------------------------------------------|-------------------------|-------------------------|-------------------------|-----------------------|-------------------|
|      | 16-24                                                          | 25-44                   | 45-64                   | 65-74                   | 75-84                 | ≥85               |
|      | <b>Male</b>                                                    |                         |                         |                         |                       |                   |
|      | <i>Number of Estimated Patients (95% Confidence Intervals)</i> |                         |                         |                         |                       |                   |
| 1993 | 2,405<br>(1,860, 2,950)                                        | 3,959<br>(3,114, 4,804) | 1,816<br>(1,455, 2,176) | 695<br>(518, 871)       | 428<br>(305, 551)     | 197<br>(128, 266) |
| 1994 | 2,508<br>(1,958, 3,057)                                        | 4,031<br>(3,102, 4,961) | 2,110<br>(1,719, 2,502) | 666<br>(505, 826)       | 533<br>(398, 668)     | 179<br>(119, 239) |
| 1995 | 2,317<br>(1,756, 2,877)                                        | 4,080<br>(3,331, 4,830) | 1,891<br>(1,594, 2,188) | 678<br>(530, 826)       | 562<br>(437, 686)     | 209<br>(144, 275) |
| 1996 | 2,225<br>(1,682, 2,769)                                        | 3,969<br>(3,142, 4,795) | 2,083<br>(1,718, 2,449) | 805<br>(635, 976)       | 487<br>(366, 608)     | 144<br>(77, 211)  |
| 1997 | 1,961<br>(1,457, 2,465)                                        | 3,595<br>(2,923, 4,268) | 1,906<br>(1,522, 2,291) | 644<br>(505, 782)       | 501<br>(395, 607)     | 174<br>(117, 231) |
| 1998 | 2,211<br>(1,744, 2,679)                                        | 4,320<br>(3,425, 5,214) | 2,135<br>(1,651, 2,618) | 597<br>(459, 734)       | 714<br>(572, 855)     | 227<br>(151, 302) |
| 1999 | 2,097<br>(1,686, 2,508)                                        | 3,698<br>(3,023, 4,373) | 2,329<br>(1,941, 2,718) | 681<br>(538, 825)       | 620<br>(485, 754)     | 274<br>(187, 362) |
| 2000 | 2,052<br>(1,676, 2,428)                                        | 3,639<br>(3,000, 4,279) | 2,321<br>(1,931, 2,711) | 716<br>(573, 859)       | 597<br>(475, 719)     | 223<br>(159, 287) |
| 2001 | 1,882<br>(1,483, 2,281)                                        | 3,171<br>(2,588, 3,754) | 2,236<br>(1,902, 2,569) | 730<br>(584, 877)       | 753<br>(614, 891)     | 249<br>(172, 326) |
| 2002 | 1,950<br>(1,523, 2,377)                                        | 3,618<br>(2,930, 4,307) | 2,594<br>(2,232, 3,055) | 747<br>(608, 886)       | 705<br>(570, 841)     | 288<br>(216, 360) |
| 2003 | 1,992<br>(1,576, 2,407)                                        | 3,404<br>(2,759, 4,049) | 2,977<br>(2,466, 3,487) | 766<br>(610, 923)       | 680<br>(553, 807)     | 300<br>(218, 382) |
| 2004 | 2,675<br>(2,086, 3,264)                                        | 4,208<br>(3,366, 5,049) | 3,824<br>(3,094, 4,554) | 920<br>(721, 1,120)     | 778<br>(609, 948)     | 314<br>(225, 402) |
| 2005 | 1,967<br>(1,563, 2,371)                                        | 3,053<br>(2,437, 3,668) | 2,767<br>(2,286, 3,247) | 746<br>(593, 898)       | 655<br>(519, 791)     | 283<br>(206, 360) |
| 2006 | 2,102<br>(1,694, 2,509)                                        | 3,812<br>(3,141, 4,484) | 3,346<br>(2,856, 3,836) | 940<br>(777, 1,102)     | 834<br>(684, 984)     | 388<br>(299, 478) |
| 2007 | 2,194<br>(1,734, 2,654)                                        | 3,481<br>(2,813, 4,148) | 3,448<br>(2,844, 4,053) | 924<br>(751, 1,098)     | 820<br>(654, 983)     | 399<br>(303, 495) |
| 2008 | 1,787<br>(1,408, 2,167)                                        | 3,017<br>(2,429, 3,606) | 3,263<br>(2,710, 3,816) | 1,046<br>(860, 1,232)   | 869<br>(698, 1,041)   | 401<br>(295, 506) |
| 2009 | 1,771<br>(1,427, 2,115)                                        | 2,796<br>(2,296, 3,297) | 3,479<br>(2,934, 4,024) | 1,141<br>(959, 1,323)   | 860<br>(695, 1,025)   | 389<br>(296, 483) |
| 2010 | 2,173<br>(1,742, 2,604)                                        | 4,127<br>(3,382, 4,872) | 4,463<br>(3,731, 5,194) | 1,364<br>(1,112, 1,615) | 1,076<br>(884, 1,268) | 485<br>(368, 602) |
| 2011 | 1,645<br>(1,274, 2,017)                                        | 2,750<br>(2,119, 3,382) | 3,581<br>(2,926, 4,235) | 1,283<br>(1,032, 1,534) | 997<br>(828, 1,165)   | 449<br>(350, 548) |
| 2012 | 1,770<br>(1,522, 2,018)                                        | 2,930<br>(2,573, 3,287) | 4,255<br>(3,784, 4,726) | 1,465<br>(1,264, 1,666) | 855<br>(718, 992)     | 460<br>(360, 560) |

**eTable 3.** Age and Sex Stratified Estimated Number of Patients with Acute Traumatic Spinal Cord Injury in the United States (continued)

|      | <b>Female</b>                                                  |                         |                         |                   |                     |                   |
|------|----------------------------------------------------------------|-------------------------|-------------------------|-------------------|---------------------|-------------------|
|      | <i>Number of Estimated Patients (95% Confidence Intervals)</i> |                         |                         |                   |                     |                   |
| 1993 | 674<br>(490, 858)                                              | 1,061<br>(779, 1,342)   | 682<br>(509, 856)       | 334<br>(245, 424) | 431<br>(328, 533)   | 265<br>(177, 353) |
| 1994 | 595<br>(422, 769)                                              | 1,082<br>(818, 1,347)   | 586<br>(446, 727)       | 338<br>(249, 426) | 356<br>(267, 444)   | 233<br>(156, 309) |
| 1995 | 534<br>(420, 648)                                              | 1,304<br>(1,059, 1,548) | 677<br>(523, 831)       | 535<br>(413, 658) | 571<br>(449, 692)   | 205<br>(142, 269) |
| 1996 | 511<br>(391, 630)                                              | 1,218<br>(986, 1,450)   | 766<br>(603, 929)       | 397<br>(286, 508) | 476<br>(372, 580)   | 300<br>(224, 376) |
| 1997 | 512<br>(387, 638)                                              | 1,029<br>(850, 1,208)   | 612<br>(490, 734)       | 451<br>(349, 554) | 455<br>(354, 555)   | 239<br>(165, 313) |
| 1998 | 613<br>(448, 779)                                              | 1,018<br>(799, 1,236)   | 803<br>(646, 959)       | 392<br>(306, 478) | 475<br>(371, 579)   | 286<br>(207, 365) |
| 1999 | 633<br>(473, 794)                                              | 954<br>(786, 1,122)     | 768<br>(620, 915)       | 322<br>(238, 406) | 458<br>(356, 560)   | 255<br>(179, 332) |
| 2000 | 531<br>(384, 678)                                              | 978<br>(785, 1,171)     | 602<br>(457, 746)       | 337<br>(247, 426) | 496<br>(397, 595)   | 355<br>(265, 445) |
| 2001 | 462<br>(336, 587)                                              | 765<br>(575, 956)       | 715<br>(564, 865)       | 365<br>(274, 456) | 605<br>(489, 721)   | 221<br>(155, 287) |
| 2002 | 521<br>(391, 650)                                              | 996<br>(797, 1,195)     | 885<br>(685, 1,085)     | 362<br>(274, 450) | 616<br>(491, 741)   | 291<br>(212, 371) |
| 2003 | 605<br>(446, 764)                                              | 1,039<br>(787, 1,291)   | 956<br>(772, 1,140)     | 490<br>(390, 589) | 596<br>(466, 725)   | 325<br>(244, 406) |
| 2004 | 828<br>(606, 1,051)                                            | 1,360<br>(1,036, 1,684) | 1,253<br>(989, 1,516)   | 540<br>(368, 712) | 749<br>(615, 884)   | 356<br>(263, 449) |
| 2005 | 542<br>(407, 677)                                              | 901<br>(704, 1,098)     | 869<br>(706, 1,031)     | 406<br>(314, 498) | 654<br>(546, 761)   | 371<br>(282, 461) |
| 2006 | 657<br>(503, 811)                                              | 939<br>(754, 1,124)     | 1,182<br>(974, 1,390)   | 437<br>(347, 528) | 649<br>(532, 766)   | 428<br>(329, 528) |
| 2007 | 605<br>(452, 759)                                              | 927<br>(753, 1,101)     | 1,095<br>(899, 1,292)   | 482<br>(379, 586) | 752<br>(623, 881)   | 402<br>(299, 504) |
| 2008 | 469<br>(327, 611)                                              | 980<br>(739, 1,222)     | 1,189<br>(962, 1,415)   | 587<br>(468, 705) | 768<br>(627, 909)   | 460<br>(353, 567) |
| 2009 | 464<br>(337, 591)                                              | 836<br>(656, 1,016)     | 1,228<br>(1,028, 1,428) | 668<br>(527, 809) | 761<br>(609, 913)   | 467<br>(365, 569) |
| 2010 | 668<br>(497, 840)                                              | 1,157<br>(892, 1,423)   | 1,488<br>(1,233, 1,742) | 730<br>(587, 873) | 856<br>(701, 1,011) | 579<br>(466, 692) |
| 2011 | 409<br>(293, 525)                                              | 807<br>(608, 1,006)     | 1,269<br>(1,049, 1,489) | 666<br>(532, 800) | 761<br>(629, 894)   | 580<br>(470, 691) |
| 2012 | 525<br>(405, 645)                                              | 850<br>(697, 1003)      | 1,470<br>(1,280, 1,660) | 675<br>(560, 790) | 770<br>(644, 896)   | 525<br>(426, 624) |

**eTable 4.** Total Population\*<sup>1-3</sup> Estimates Used for Calculation of Incidence Rates

| <b>Year</b> | <b>Total Resident Population</b> |
|-------------|----------------------------------|
| 1993        | 257,783,000                      |
| 1994        | 260,327,000                      |
| 1995        | 262,803,000                      |
| 1996        | 265,229,000                      |
| 1997        | 267,784,000                      |
| 1998        | 270,248,000                      |
| 1999        | 272,691,000                      |
| 2000        | 282,171,957                      |
| 2001        | 285,081,556                      |
| 2002        | 287,803,914                      |
| 2003        | 290,326,418                      |
| 2004        | 293,045,739                      |
| 2005        | 295,753,151                      |
| 2006        | 298,593,212                      |
| 2007        | 301,579,895                      |
| 2008        | 304,374,846                      |
| 2009        | 307,006,550                      |
| 2010        | 308,745,538                      |
| 2011        | 311,587,816                      |
| 2012        | 313,914,040                      |

\*Population estimates as of July 1 for each year used except for the year 2010 where April 1 estimates used



**eTable 5.** Population\*<sup>1-3</sup> Estimates by Age and Sex Used for Calculation of Incidence Rates

| Year | Age-Groups    |            |            |            |           |           |
|------|---------------|------------|------------|------------|-----------|-----------|
|      | 16-24         | 25-44      | 45-64      | 65-74      | 75-84     | ≥85       |
|      | <b>Male</b>   |            |            |            |           |           |
| 1993 | 16,680,000    | 41,089,000 | 23,924,000 | 8,235,000  | 4,108,000 | 964,000   |
| 1994 | 16,604,000    | 41,237,000 | 24,572,000 | 8,291,000  | 4,219,000 | 1,003,000 |
| 1995 | 16,545,000    | 41,401,000 | 25,234,000 | 8,345,000  | 4,345,000 | 1,045,000 |
| 1996 | 16,569,000    | 41,544,000 | 25,966,000 | 8,336,000  | 4,500,000 | 1,086,000 |
| 1997 | 16,743,000    | 41,507,000 | 26,817,000 | 8,284,000  | 4,645,000 | 1,132,000 |
| 1998 | 17,044,000    | 41,332,000 | 27,697,000 | 8,248,000  | 4,760,000 | 1,187,000 |
| 1999 | 17,371,000    | 41,081,000 | 28,650,000 | 8,199,000  | 4,871,000 | 1,240,000 |
| 2000 | 18,117,715    | 42,558,568 | 30,366,914 | 8,303,225  | 4,912,292 | 1,238,127 |
| 2001 | 18,531,222    | 42,435,306 | 31,337,511 | 8,315,726  | 5,015,752 | 1,271,345 |
| 2002 | 18,849,847    | 42,252,218 | 32,372,437 | 8,323,850  | 5,119,703 | 1,308,544 |
| 2003 | 19,051,397    | 42,013,026 | 33,374,129 | 8,378,523  | 5,207,047 | 1,361,463 |
| 2004 | 19,297,618    | 41,958,828 | 34,362,813 | 8,454,163  | 5,277,601 | 1,407,491 |
| 2005 | 19,453,413    | 41,886,372 | 35,410,204 | 8,548,674  | 5,349,022 | 1,476,971 |
| 2006 | 19,679,820    | 41,930,561 | 36,384,295 | 8,687,370  | 5,389,647 | 1,556,119 |
| 2007 | 19,829,243    | 41,992,219 | 37,280,536 | 8,911,783  | 5,420,783 | 1,636,041 |
| 2008 | 19,932,617    | 42,062,538 | 37,996,624 | 9,277,863  | 5,445,819 | 1,711,328 |
| 2009 | 20,026,980    | 42,080,689 | 38,754,970 | 9,593,390  | 5,447,496 | 1,782,674 |
| 2010 | 20,140,820    | 41,068,090 | 39,743,507 | 10,096,519 | 5,476,762 | 1,789,679 |
| 2011 | 20,295,728    | 41,260,776 | 40,384,134 | 10,477,161 | 5,570,786 | 1,886,138 |
| 2012 | 20,393,957    | 41,512,399 | 40,409,764 | 11,202,862 | 5,648,150 | 1,964,033 |
|      | <b>Female</b> |            |            |            |           |           |
| 1993 | 15,980,000    | 41,522,000 | 25,648,000 | 10,395,000 | 6,630,000 | 2,482,000 |
| 1994 | 15,912,000    | 41,697,000 | 26,311,000 | 10,412,000 | 6,726,000 | 2,560,000 |
| 1995 | 15,838,000    | 41,886,000 | 26,996,000 | 10,412,000 | 6,833,000 | 2,640,000 |
| 1996 | 15,845,000    | 42,066,000 | 27,746,000 | 10,355,000 | 6,967,000 | 2,714,000 |
| 1997 | 16,000,000    | 42,066,000 | 28,626,000 | 10,244,000 | 7,099,000 | 2,781,000 |
| 1998 | 16,283,000    | 41,910,000 | 29,544,000 | 10,141,000 | 7,187,000 | 2,862,000 |
| 1999 | 16,580,000    | 41,668,000 | 30,543,000 | 10,020,000 | 7,275,000 | 2,935,000 |
| 2000 | 17,222,725    | 42,436,055 | 32,034,958 | 10,071,381 | 7,516,285 | 3,032,394 |
| 2001 | 17,571,659    | 42,213,338 | 33,037,253 | 10,026,654 | 7,607,929 | 3,083,046 |
| 2002 | 17,852,182    | 41,957,845 | 34,112,757 | 9,986,312  | 7,697,177 | 3,135,305 |
| 2003 | 18,074,292    | 41,696,998 | 35,148,946 | 10,002,268 | 7,760,781 | 3,212,825 |
| 2004 | 18,256,975    | 41,511,385 | 36,170,563 | 10,047,624 | 7,799,612 | 3,277,003 |
| 2005 | 18,358,892    | 41,370,744 | 37,228,170 | 10,116,963 | 7,827,137 | 3,384,930 |
| 2006 | 18,524,457    | 41,292,574 | 38,228,904 | 10,248,779 | 7,817,044 | 3,506,957 |
| 2007 | 18,681,302    | 41,229,658 | 39,136,259 | 10,477,521 | 7,792,702 | 3,628,315 |
| 2008 | 18,809,577    | 41,135,931 | 39,860,005 | 10,861,120 | 7,765,319 | 3,738,442 |
| 2009 | 18,916,681    | 41,015,589 | 40,624,462 | 11,198,677 | 7,700,366 | 3,847,987 |
| 2010 | 19,242,702    | 41,066,464 | 41,745,938 | 11,616,910 | 7,584,360 | 3,703,754 |
| 2011 | 19,349,664    | 41,171,522 | 42,420,427 | 12,008,524 | 7,601,156 | 3,828,765 |
| 2012 | 19,405,934    | 41,313,342 | 42,445,176 | 12,782,530 | 7,624,484 | 3,923,297 |

\*Population estimates as of July 1 for each year used except for the year 2010 where April 1 estimates used

© 2015 American Medical Association. All rights reserved.

**eTable 6.** Etiology of Acute Traumatic Spinal Cord Injury, United States

| <b>Year</b> | <b>Motor Vehicle Accidents</b>       | <b>Unintentional Falls</b> | <b>Firearm Injuries</b> |
|-------------|--------------------------------------|----------------------------|-------------------------|
|             | <i>% of Total SCI Cases (95% CI)</i> |                            |                         |
| 1997        | 31.4 (29.7, 33.0)                    | 19.3 (17.9,20.7)           | 7.0 (6.1, 7.9)          |
| 1998        | 32.9 (31.2, 34.6)                    | 21.6 (20.1, 23.1)          | 6.4 (5.5, 7.3)          |
| 1999        | 35.0 (33.3, 36.8)                    | 21.8 (20.3, 23.3)          | 5.4 (4.6, 6.3)          |
| 2000        | 31.7 (30.0, 33.4)                    | 21.4 (19.9, 22.9)          | 6.5 (5.6, 7.4)          |
| 2001        | 33.1 (31.3, 34.9)                    | 25.0 (23.3, 26.6)          | 4.1 (3.3, 4.9)          |
| 2002        | 33.9 (32.2, 35.6)                    | 30.3 (28.7, 31.9)          | 7.5 (6.6, 8.4)          |
| 2003        | 35.3 (33.7, 37.0)                    | 32.0 (30.4, 33.6)          | 5.5 (4.7, 6.3)          |
| 2004        | 38.6 (37.1, 40.1)                    | 30.4 (29.0, 31.9)          | 5.0 (4.3, 5.7)          |
| 2005        | 37.1 (35.3, 38.8)                    | 29.8 (28.2, 31.4)          | 5.8 (4.9,6.6)           |
| 2006        | 34.1 (32.5, 35.7)                    | 32.3 (30.7, 33.8)          | 6.0 (5.2, 6.8)          |
| 2007        | 33.8 (32.2, 35.4)                    | 31.4 (29.8, 32.9)          | 6.9 (6.0, 7.7)          |
| 2008        | 33.1 (31.5, 34.7)                    | 39.4 (37.7, 41.0)          | 5.7 (4.9, 6.5)          |
| 2009        | 33.3 (31.7, 34.9)                    | 38.6 (36.9, 40.3)          | 5.2 (4.4, 6.0)          |
| 2010        | 30.6 (29.2, 32.0)                    | 38.4 (36.9, 39.9)          | 5.6 (4.9, 6.3)          |
| 2011        | 29.8 (28.2, 31.3)                    | 42.1 (40.5, 43.8)          | 5.5 (4.7, 6.2)          |
| 2012        | 31.0 (29.4, 32.5)                    | 40.4 (38.7, 42.0)          | 5.4 (4.6, 6.2)          |

CI=Confidence Intervals

Note: The terms motor vehicle accidents and motor vehicle crashes are used interchangeably.

**eTable 7.** Select Age-Stratified Trends in Etiology of Acute Traumatic Spinal Cord Injury in the United States

| Etiology and Age-Group              | Years                                                                                             |                        |                        |                        | Armitage Trend p-value |
|-------------------------------------|---------------------------------------------------------------------------------------------------|------------------------|------------------------|------------------------|------------------------|
|                                     | 1997-2000                                                                                         | 2001-2004              | 2005-2009              | 2010-2012              |                        |
|                                     | <i>Percentage of patients (95% Confidence Limits)<br/>(Total number of patients in age-group)</i> |                        |                        |                        |                        |
| MVA in 16-24 years                  | 40 (38, 42)<br>(2,255)                                                                            | 47 (45, 49)<br>(2,314) | 45 (43, 47)<br>(2,664) | 44 (42, 47)<br>(1,480) | 0.019                  |
| MVA in 25-44 years                  | 37 (36, 39)<br>(4,105)                                                                            | 43 (42, 45)<br>(3,936) | 44 (43, 46)<br>(4,397) | 40 (38, 42)<br>(2,609) | 0.0002                 |
| Firearm injury in 16-24 years       | 17 (16, 19)<br>(2,255)                                                                            | 14 (13, 15)<br>(2,314) | 18 (17, 20)<br>(2,664) | 18 (16, 20)<br>(1,480) | 0.065                  |
| Falls in elderly ( $\geq 65$ years) | 28 (26, 30)<br>(2,226)                                                                            | 51 (49, 53)<br>(2,694) | 60 (59, 62)<br>(3,986) | 66 (64, 68)<br>(3,022) | <0.0001                |

MVA=Motor Vehicle Accidents

Note: Unweighted calculations are presented in this table. The terms motor vehicle accidents and motor vehicle crashes are used interchangeably.

## eReferences

1. United States Census Bureau. Resident Population Estimates of the United States by Age and Sex: April 1, 1990 to July 1, 1999. 2001; <http://www.census.gov/popest/data/national/totals/1990s/tables/nat-agesex.txt>. Accessed June 7, 2012.
2. United States Census Bureau. Annual Estimates of the Resident Population for the United States, Regions, States, and Puerto Rico: April 1, 2000 to July 1, 2009. 2010; [http://www.census.gov/popest/data/historical/2000s/vintage\\_2009/](http://www.census.gov/popest/data/historical/2000s/vintage_2009/). Accessed June 7, 2012.
3. United States Census Bureau. Annual Estimates of the Resident Population for Selected Age Groups by Sex: April 1, 2010 to July 1, 2012. 2012; [https://www.census.gov/popest/data/historical/2010s/vintage\\_2012/national.html](https://www.census.gov/popest/data/historical/2010s/vintage_2012/national.html). Accessed December 27, 2014.
